# Supplementary material for: Reproducible Genetic Risk Loci for Anxiety: Results From ∼200,000 Participants in the Million Veteran Program
Source: Atypon-hosted journal article supplement (doi:10.1176/appi.ajp.2019.19030256), 2020-01-07
Supplement: appi.ajp.2019.19030256.ds001.pdf [file appi.ajp.2019.19030256.ds001.pdf]

Data supplement for Levey et al., Reproducible Genetic Risk Loci for Anxiety: Results From ~200,000 Million Veteran Program Program Participants. Am J Psychiatry (doi: 10.1176/appi.ajp.2019.19030256)

FIGURE S1. Manhattan Plot for EA Anxiety/Panic Case-Control GWAS

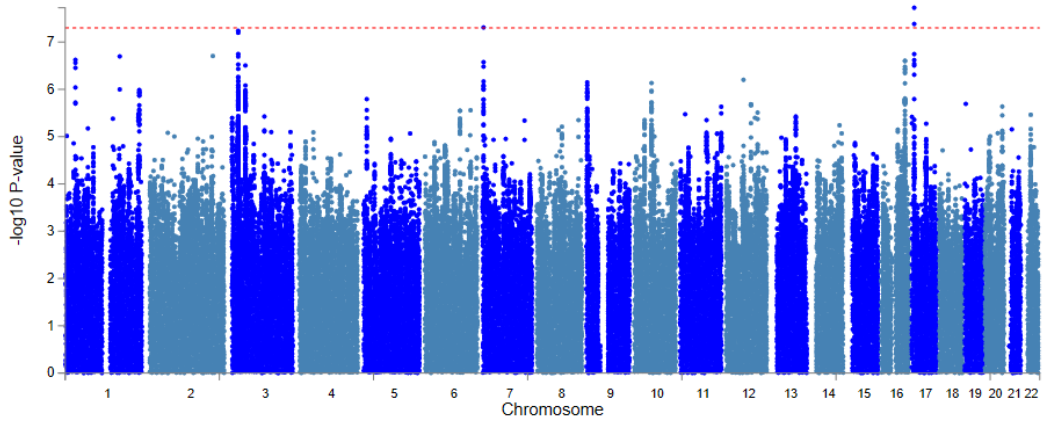

FIGURE S2. Manhattan plot for AA Anxiety/Panic Case-Control GWAS

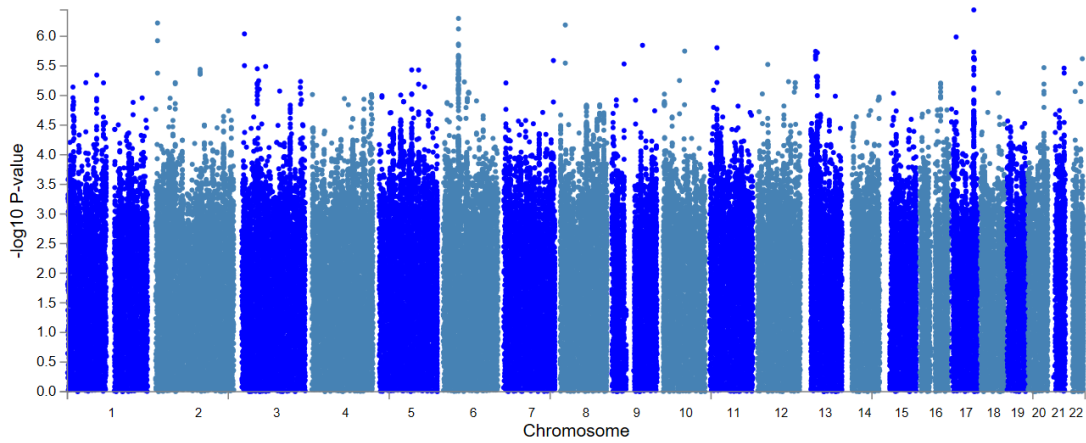

FIGURE S3. Conditional Analysis with mtCOJO using the PGC MDD2 summary statistics (excluding 23andMe). Top is the original GWAS of GAD-2, bottom is the conditional analysis. In most cases signal was reduced by an order of magnitude; peaks on chromosomes 3 and 6 remain GWS.

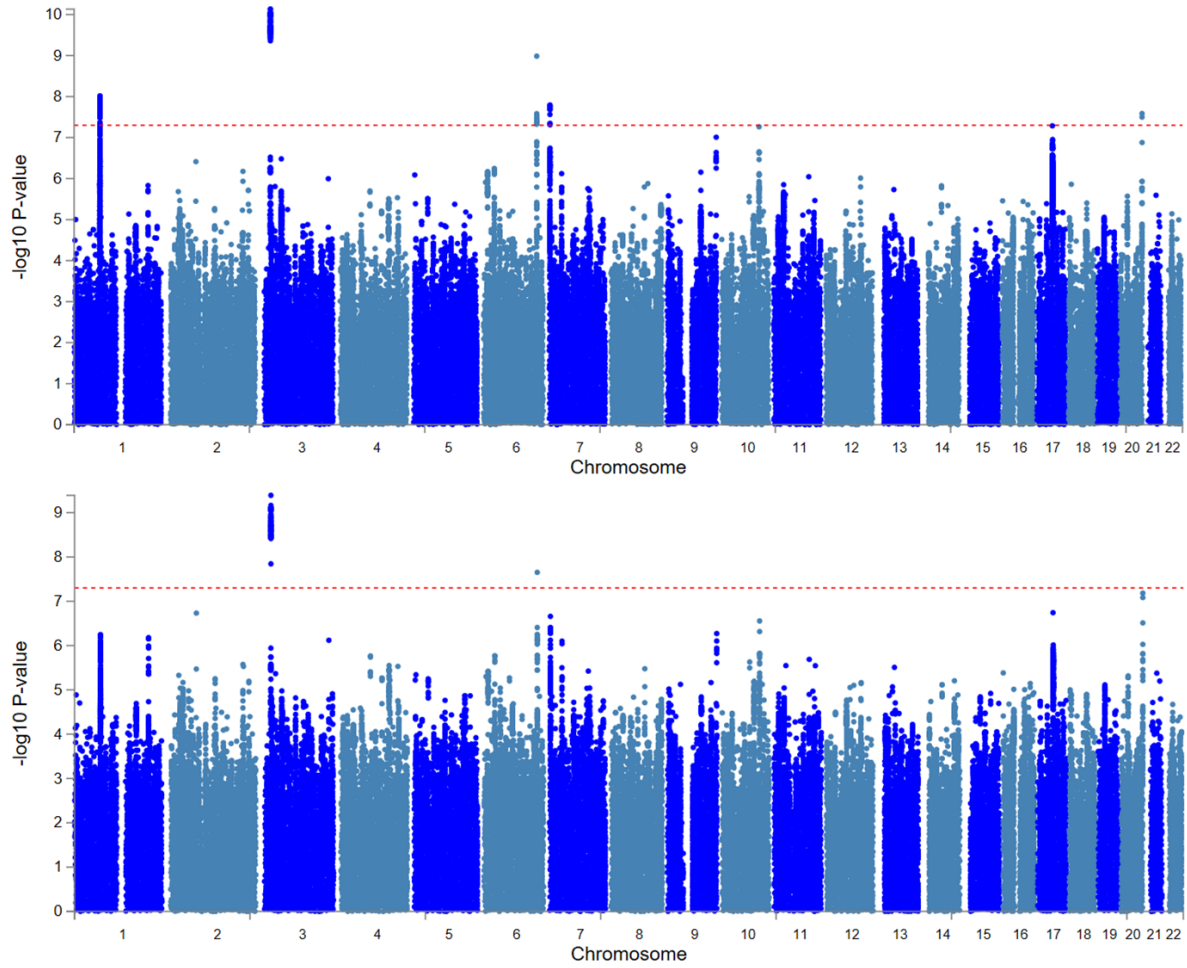

FIGURE S4. GWAS for European Americans (list of significant genes in Table S3)

### GAD-2

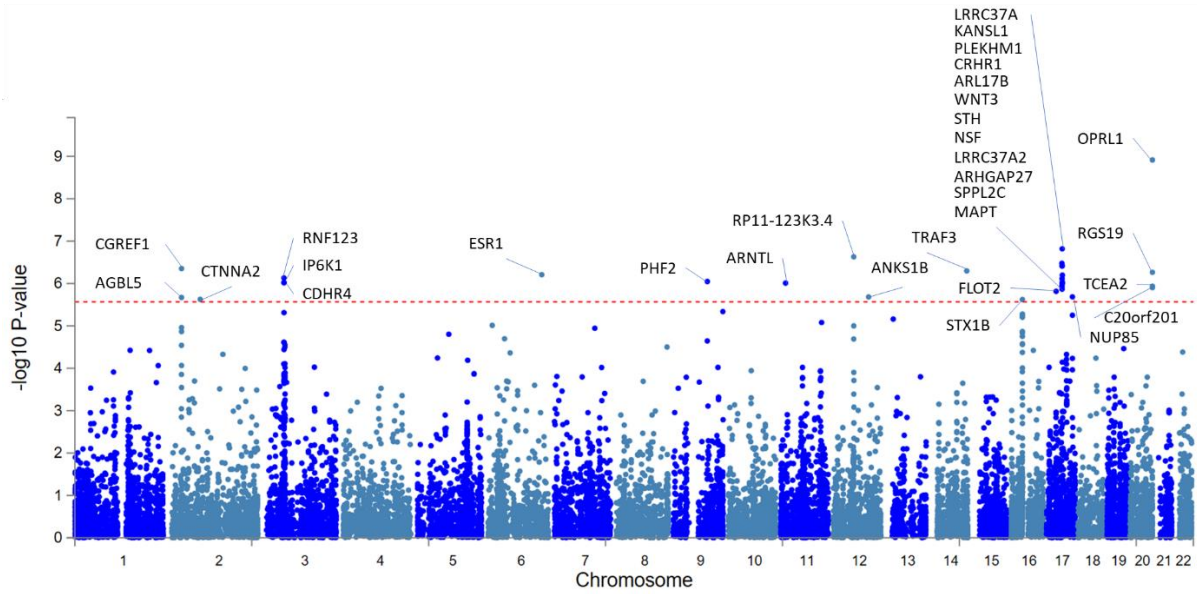

### Case-Control

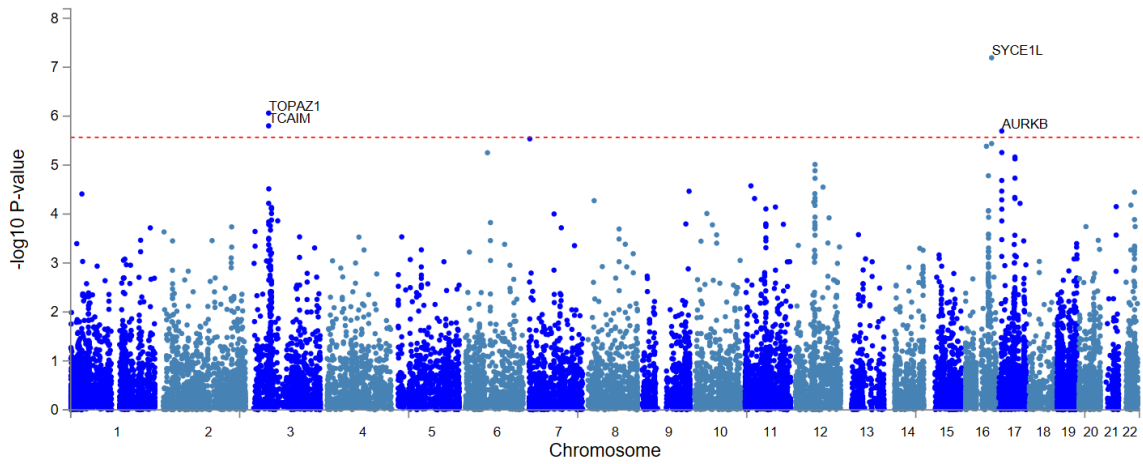

FIGURE S5. Regional Manhattan Plots for GAD-2 GWAS

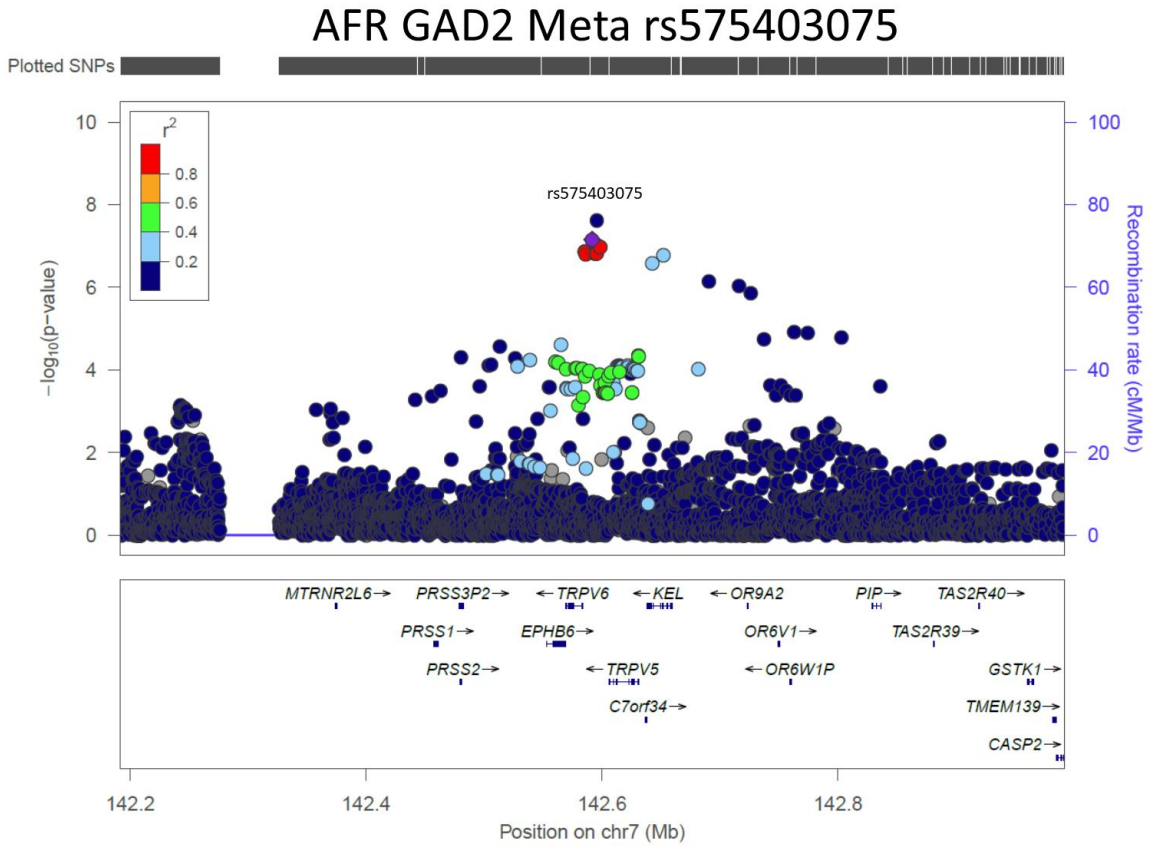

# EA GAD2 Meta rs12023347

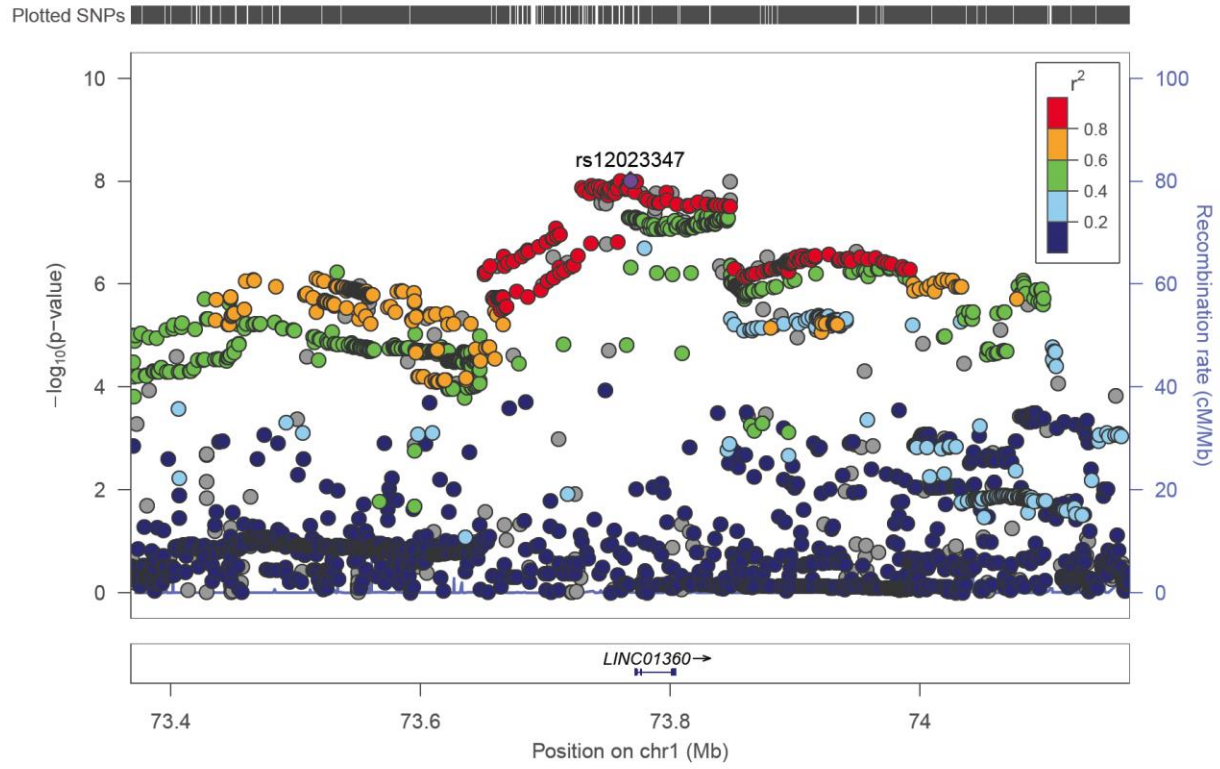

# EA GAD2 Meta rs4603973

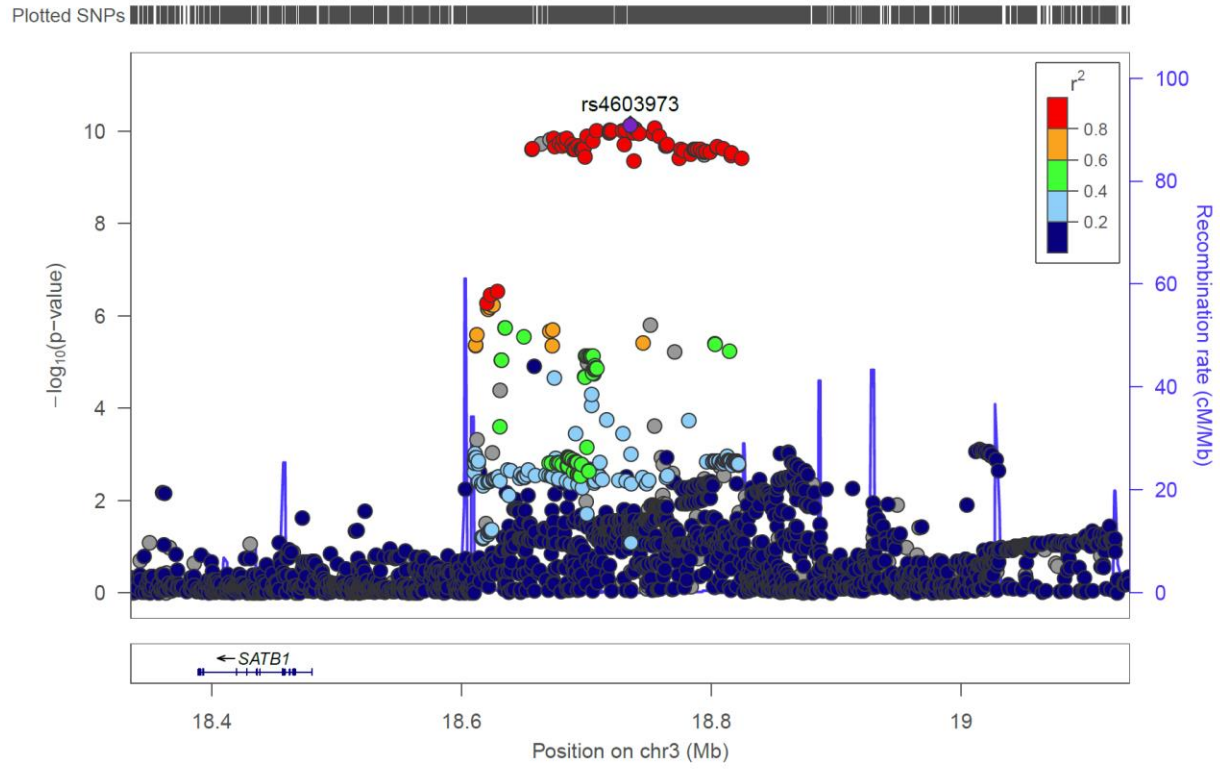

# EA GAD2 Meta rs6557168

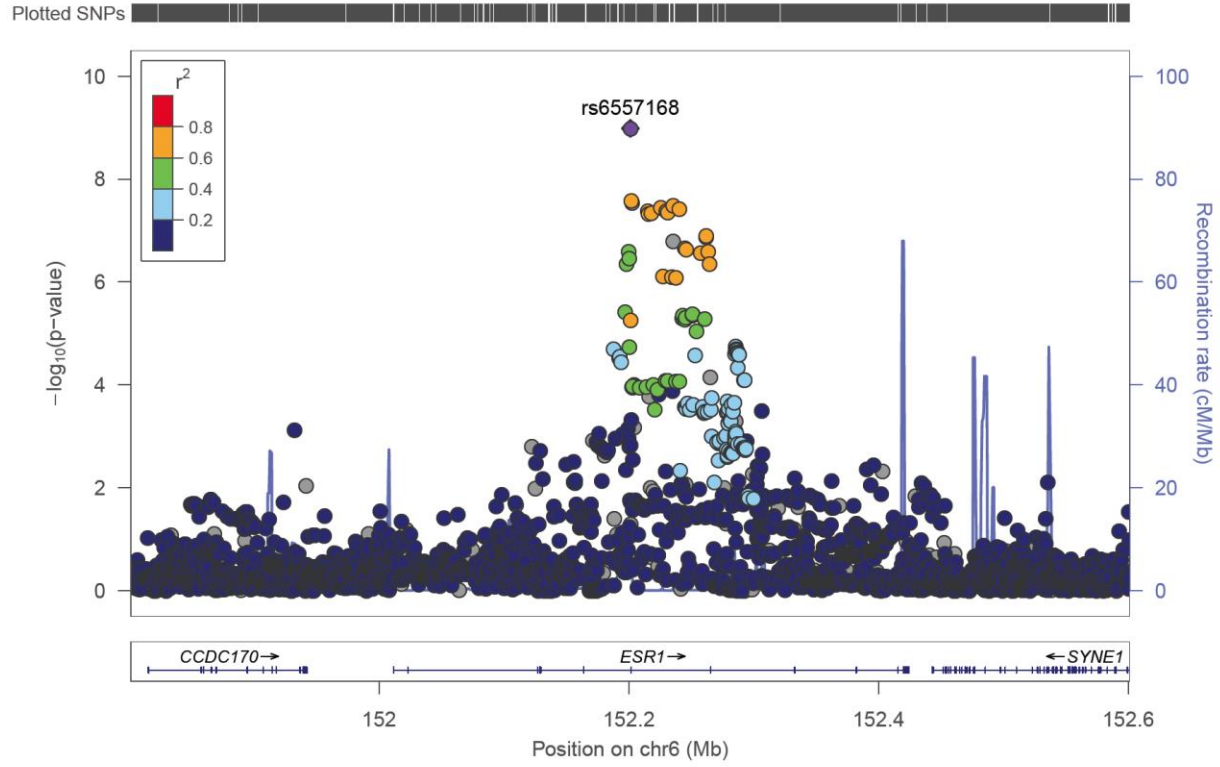

# EA GAD2 Meta rs56226325

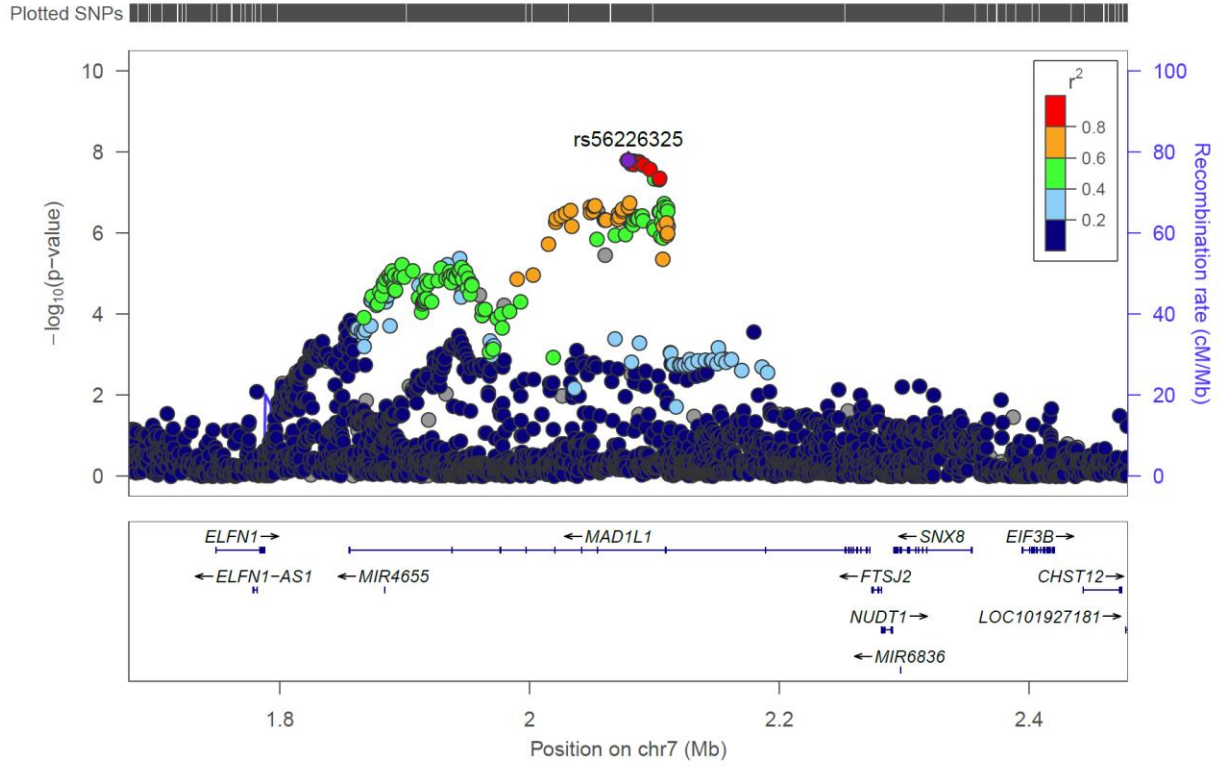



# EA GAD2 Meta rs6090040

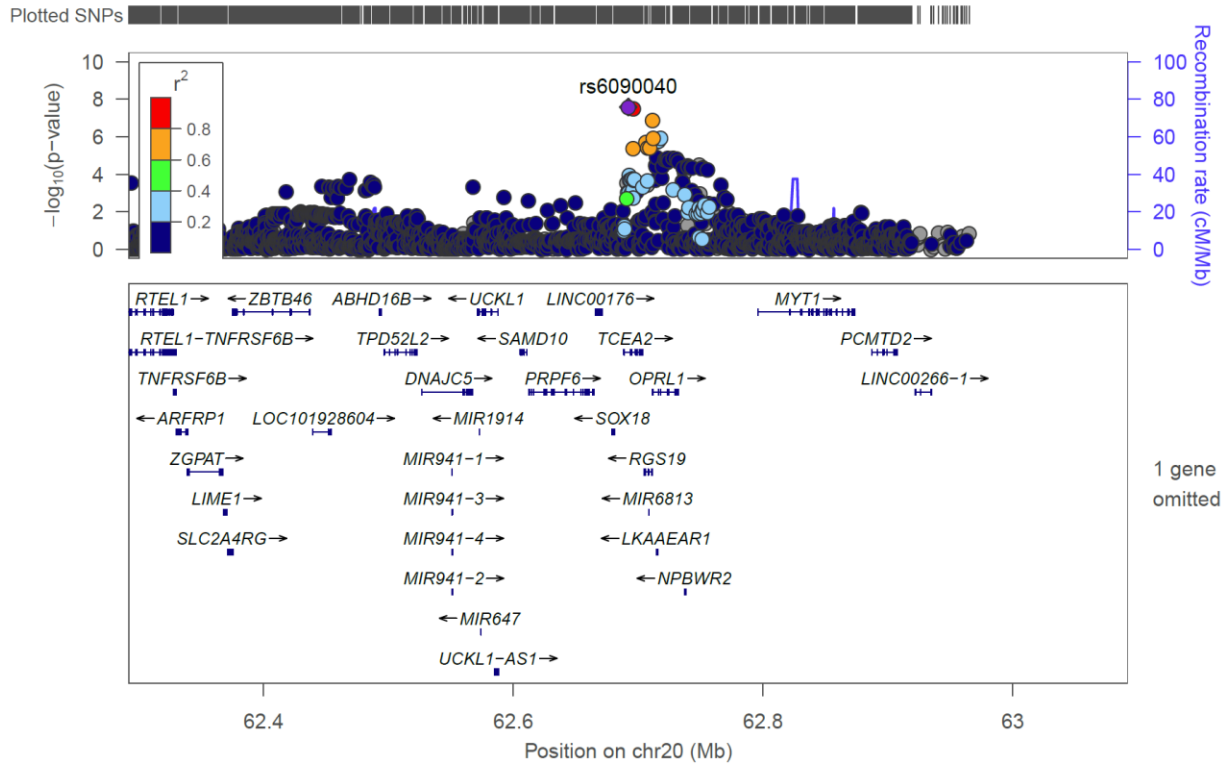

FIGURE S6. Fine mapping analysis conducted in PAINTOR v3. Upper box plots the posterior probabilities on the y axis and the SNP position on the x axis. The second box represents the annotation used, which comes from fetal brain tissue.<sup>1</sup> The third row shows a regional plot of the original GWAS. Lead SNPs from the GWAS analysis do not necessarily line up with the highest Bayesian posterior probability. The fourth row contains LD structure of the loci analyzed.

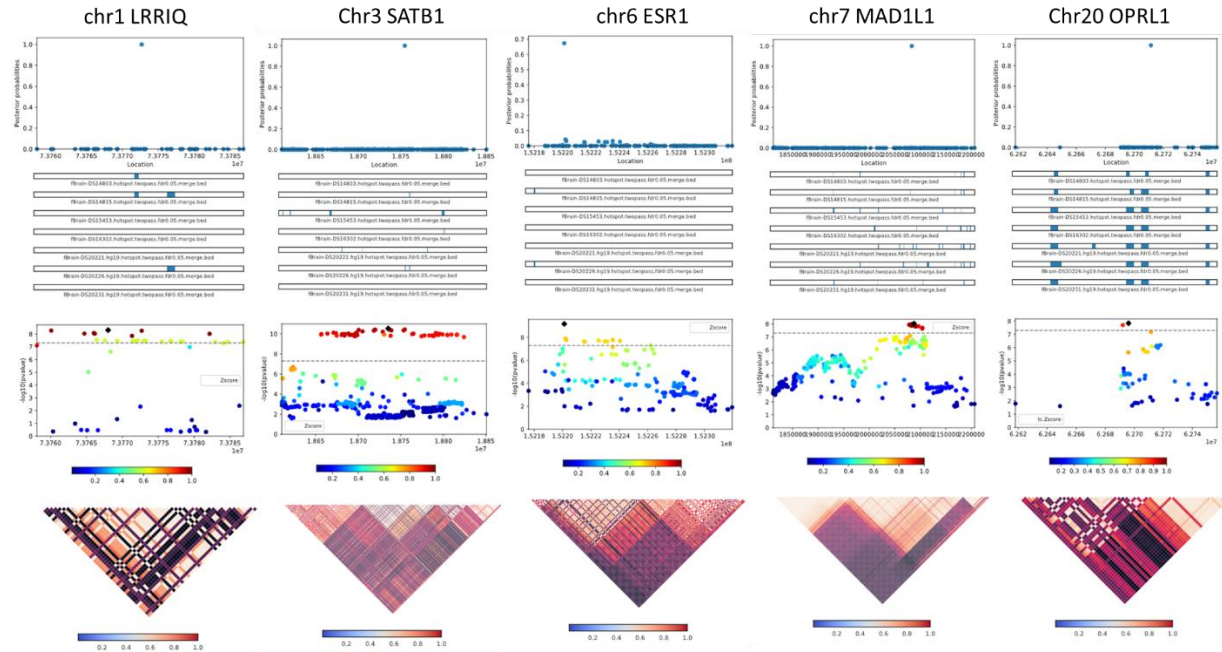

FIGURE S7. Polygenic Risk Scores

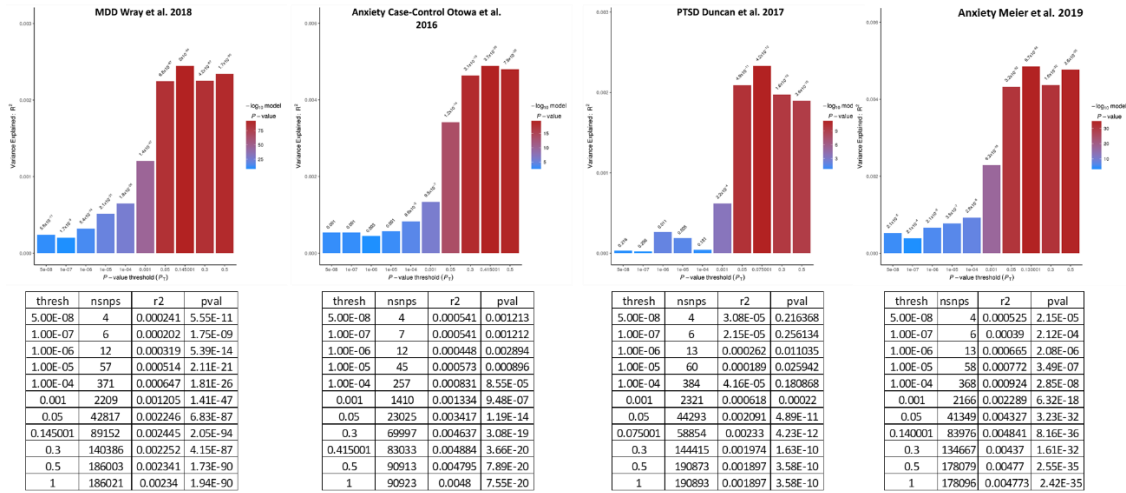

FIGURE S8. Trans-populational meta-analysis of European and American subjects for the GAD-2 trait. Lead SNPs were largely the same except that the signal on chromosome 20 is no longer genome-wide significant and a new signal near CRHR1 on chromosome 17 is now genome-wide significant.

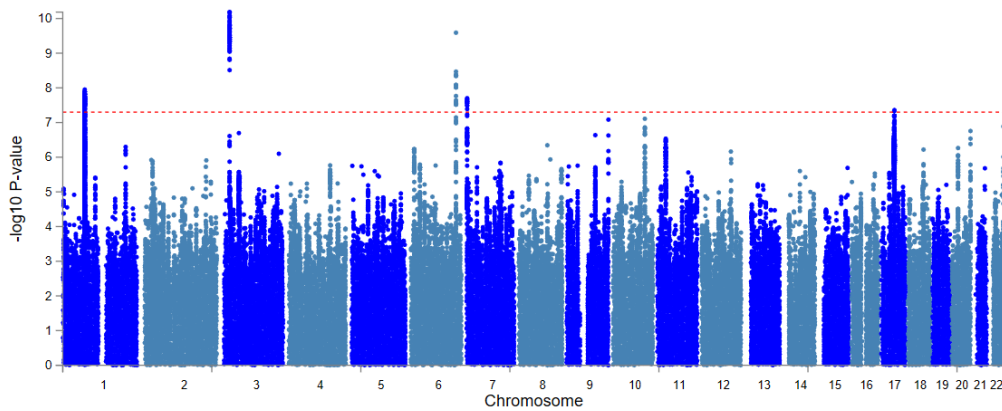

FIGURE S9. QQplot for GAD2 GWAS in European Americans

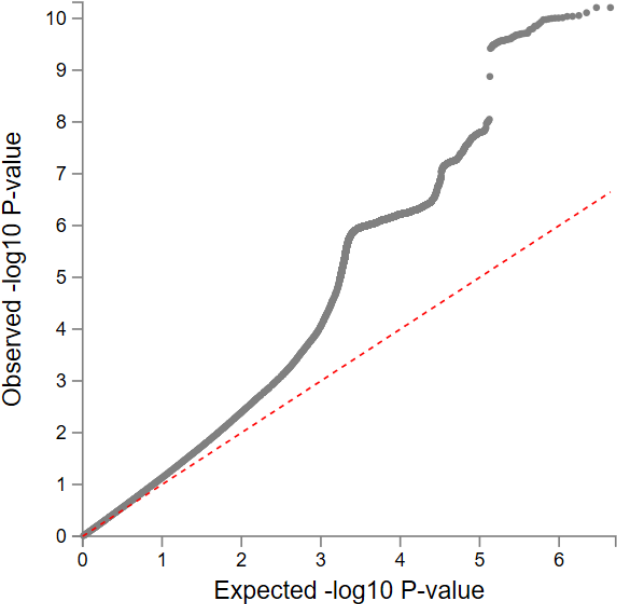

TABLE S1. GAD-2 Phenotype

| <b>GAD-2</b>                                                                                                                          |            |              |                         |                  |
|---------------------------------------------------------------------------------------------------------------------------------------|------------|--------------|-------------------------|------------------|
| <b>Over the last 2 weeks, how often have you been bothered by the following problems?</b><br><i>(Use "✓" to indicate your answer)</i> | Not at all | Several days | More than half the days | Nearly every day |
| 1. Feeling nervous, anxious, or on edge                                                                                               | 0          | 1            | 2                       | 3                |
| 2. Not being able to stop or control worrying                                                                                         | 0          | 1            | 2                       | 3                |

TABLE S2. Case control sample sizes

|                              | Case  | Control | Total  |
|------------------------------|-------|---------|--------|
| SR-Anx<br>European Americans | 28525 | 163731  | 192256 |
| SR-Anx<br>African Americans  | 5664  | 26410   | 32074  |

TABLE S3. Gene-Based Genome-Wide Association (GWGAS) in EAs

EA Meta GWGAS

| GENE            | CHR | START    | STOP     | NSNPS | NPARAM | N      | ZSTAT  | P        | SYMBOL       |
|-----------------|-----|----------|----------|-------|--------|--------|--------|----------|--------------|
| ENSG00000125510 | 20  | 62711526 | 62731996 | 50    | 13     | 175163 | 5.9748 | 1.15E-09 | OPRL1        |
| ENSG00000176681 | 17  | 44370099 | 44415160 | 12    | 3      | 175163 | 5.1386 | 1.38E-07 | LRR37A       |
| ENSG00000120071 | 17  | 44107282 | 44302733 | 1014  | 6      | 175163 | 5.0888 | 1.80E-07 | KANSL1       |
| ENSG00000258830 | 12  | 57643392 | 57690267 | 72    | 14     | 175163 | 5.0489 | 2.22E-07 | RP11-123K3.4 |
| ENSG00000225190 | 17  | 43513266 | 43568115 | 157   | 8      | 175163 | 4.9858 | 3.09E-07 | PLEKHM1      |
| ENSG00000120088 | 17  | 43699267 | 43913194 | 1155  | 10     | 175163 | 4.9557 | 3.60E-07 | CRHR1        |
| ENSG00000228696 | 17  | 44352150 | 44439130 | 192   | 6      | 175163 | 4.9528 | 3.66E-07 | ARL17B       |
| ENSG00000138028 | 2   | 27321757 | 27341995 | 47    | 9      | 175163 | 4.9128 | 4.49E-07 | CGREF1       |
| ENSG00000171700 | 20  | 62704534 | 62711323 | 12    | 5      | 175163 | 4.8871 | 5.12E-07 | RGS19        |
| ENSG00000131323 | 14  | 1.03E+08 | 1.03E+08 | 316   | 20     | 175163 | 4.8801 | 5.30E-07 | TRAF3        |
| ENSG00000091831 | 6   | 1.52E+08 | 1.52E+08 | 1673  | 89     | 175163 | 4.8585 | 5.91E-07 | ESR1         |
| ENSG00000108379 | 17  | 44839872 | 44910520 | 144   | 26     | 175163 | 4.8513 | 6.13E-07 | WNT3         |
| ENSG00000164068 | 3   | 49726932 | 49758962 | 52    | 9      | 175163 | 4.8205 | 7.16E-07 | RNF123       |
| ENSG00000197724 | 9   | 96338689 | 96441869 | 519   | 27     | 175163 | 4.79   | 8.34E-07 | PHF2         |
| ENSG00000256762 | 17  | 44076616 | 44077060 | 1     | 1      | 175163 | 4.7896 | 8.36E-07 | STH          |
| ENSG00000073969 | 17  | 44668035 | 44834830 | 69    | 6      | 175163 | 4.7797 | 8.78E-07 | NSF          |
| ENSG00000176095 | 3   | 49761727 | 49823975 | 131   | 11     | 175163 | 4.7768 | 8.91E-07 | IP6K1        |
| ENSG00000187492 | 3   | 49828165 | 49837268 | 18    | 7      | 175163 | 4.7686 | 9.28E-07 | CDHR4        |
| ENSG00000238083 | 17  | 44588877 | 44633016 | 14    | 4      | 175163 | 4.7666 | 9.37E-07 | LRR37A2      |
| ENSG00000133794 | 11  | 13298199 | 13408813 | 307   | 37     | 175163 | 4.757  | 9.82E-07 | ARNTL        |
| ENSG00000171695 | 20  | 62714733 | 62715712 | 3     | 1      | 175163 | 4.7232 | 1.16E-06 | C20orf201    |
| ENSG00000159314 | 17  | 43471275 | 43511787 | 115   | 8      | 175163 | 4.7217 | 1.17E-06 | ARHGAP27     |
| ENSG00000185294 | 17  | 43922256 | 43924438 | 17    | 2      | 175163 | 4.7139 | 1.22E-06 | SPPL2C       |
| ENSG00000171703 | 20  | 62681189 | 62703700 | 72    | 17     | 175163 | 4.7125 | 1.22E-06 | TCEA2        |
| ENSG00000186868 | 17  | 43971748 | 44105700 | 822   | 5      | 175163 | 4.6821 | 1.42E-06 | MAPT         |
| ENSG00000132589 | 17  | 27206353 | 27224697 | 30    | 6      | 175163 | 4.653  | 1.64E-06 | FLOT2        |
| ENSG00000125450 | 17  | 73201754 | 73231853 | 68    | 9      | 175163 | 4.6278 | 1.85E-06 | NUP85        |
| ENSG00000084693 | 2   | 27265232 | 27293490 | 46    | 9      | 175163 | 4.6021 | 2.09E-06 | AGBL5        |
| ENSG00000066032 | 2   | 79412357 | 80875905 | 4914  | 287    | 175163 | 4.5966 | 2.15E-06 | CTNNA2       |
| ENSG00000185046 | 12  | 99120235 | 1E+08    | 3499  | 186    | 175163 | 4.5933 | 2.18E-06 | ANKS1B       |
| ENSG00000099365 | 16  | 31000577 | 31021949 | 47    | 10     | 175163 | 4.5538 | 2.63E-06 | STX1B        |

TABLE S4. Manually curated selection of top pathways from significant functional annotations (N=189 genes) using Ingenuity Pathway Analysis.

| Categories                                                                            | Diseases or Functions Annotation          | P-value  | # Molecules |
|---------------------------------------------------------------------------------------|-------------------------------------------|----------|-------------|
| Cancer, Organismal Injury and Abnormalities                                           | Carcinoma                                 | 1.76E-07 | 156         |
| Cellular Assembly and Organization                                                    | Binding of membrane rafts                 | 6.20E-05 | 2           |
| Carbohydrate Metabolism, Small Molecule Biochemistry                                  | Metabolism of glucose-1-phosphate         | 6.20E-05 | 2           |
| Dermatological Diseases and Conditions, Organismal Injury and Abnormalities           | Skin lesion                               | 1.21E-04 | 100         |
| Cancer, Dermatological Diseases and Conditions, Organismal Injury and Abnormalities   | Skin tumor                                | 1.69E-04 | 99          |
| Inflammatory Response                                                                 | Frequency of plasmacytoid dendritic cells | 1.85E-04 | 2           |
| Organismal Survival                                                                   | Organismal death                          | 2.26E-04 | 48          |
| Behavior                                                                              | Fear conditioning                         | 3.62E-04 | 3           |
| Gastrointestinal Disease, Hepatic System Disease, Organismal Injury and Abnormalities | Liver lesion                              | 8.84E-04 | 112         |
| Behavior, Reproductive System Development and Function                                | Mating                                    | 7.80E-03 | 2           |

Table S5.

| Trait                        | rg      | se     | z        | p        | h2_obs | h2_obs_se |
|------------------------------|---------|--------|----------|----------|--------|-----------|
| Major depressive disorder    | 0.7092  | 0.0395 | 17.9701  | 3.34E-72 | 0.082  | 0.0047    |
| Depressive symptoms          | 0.805   | 0.0524 | 15.3731  | 2.48E-53 | 0.0482 | 0.0038    |
| Neuroticism                  | 0.7171  | 0.0469 | 15.3049  | 7.09E-53 | 0.0904 | 0.0076    |
| Years of schooling 2016      | -0.3863 | 0.0297 | -13.0201 | 9.40E-39 | 0.1283 | 0.0047    |
| Intelligence                 | -0.4535 | 0.0415 | -10.9386 | 7.53E-28 | 0.1946 | 0.0104    |
| Age of first birth           | -0.4528 | 0.0444 | -10.2021 | 1.94E-24 | 0.0641 | 0.0036    |
| Subjective well being        | -0.4504 | 0.0478 | -9.4221  | 4.42E-21 | 0.0251 | 0.0021    |
| Schizophrenia                | 0.2684  | 0.0327 | 8.2097   | 2.22E-16 | 0.4601 | 0.019     |
| Insomnia                     | 0.4397  | 0.0545 | 8.0727   | 6.88E-16 | 0.1323 | 0.0118    |
| College completion           | -0.4043 | 0.0536 | -7.5376  | 4.79E-14 | 0.08   | 0.0065    |
| Educational Attainment       | -0.3959 | 0.0527 | -7.5153  | 5.68E-14 | 0.1071 | 0.008     |
| Insomnia                     | 0.4727  | 0.0646 | 7.3173   | 2.53E-13 | 0.0472 | 0.0048    |
| Neuroticism                  | 0.7451  | 0.1085 | 6.8677   | 6.52E-12 | 0.0144 | 0.0034    |
| Years of schooling 2013      | -0.3684 | 0.0539 | -6.8291  | 8.55E-12 | 0.0841 | 0.0066    |
| Major depressive disorder    | 0.4763  | 0.0727 | 6.5517   | 5.69E-11 | 0.165  | 0.0259    |
| Number of children ever born | 0.269   | 0.0477 | 5.6428   | 1.67E-08 | 0.0256 | 0.0018    |
| Smoking Initiation           | 0.3462  | 0.0625 | 5.5433   | 2.97E-08 | 0.0738 | 0.0068    |
| Childhood IQ                 | -0.4298 | 0.0815 | -5.2714  | 1.35E-07 | 0.2806 | 0.0476    |
| Waist-to-hip ratio           | 0.1834  | 0.0374 | 4.8992   | 9.62E-07 | 0.1133 | 0.0067    |
| Smoking Cessation            | -0.4148 | 0.0871 | -4.7624  | 1.91E-06 | 0.0602 | 0.0108    |
| PGC cross-disorder analysis  | 0.2544  | 0.0539 | 4.7219   | 2.34E-06 | 0.1711 | 0.0132    |
| Lung cancer                  | 0.3563  | 0.0764 | 4.6642   | 3.10E-06 | 0.3122 | 0.0656    |
| Waist circumference          | 0.1565  | 0.0339 | 4.6192   | 3.85E-06 | 0.1215 | 0.0053    |
| Anxiety                      | 0.7449  | 0.1643 | 4.5351   | 5.76E-06 | 0.0746 | 0.0295    |
| Lung cancer (all)            | 0.3637  | 0.0805 | 4.519    | 6.21E-06 | 0.1322 | 0.0295    |
| Body mass index              | 0.1476  | 0.0333 | 4.4281   | 9.50E-06 | 0.1898 | 0.0097    |
| Fathers age at death         | -0.3036 | 0.0731 | -4.1521  | 3.29E-05 | 0.0389 | 0.0066    |
| Peak expiratory flow         | -0.1105 | 0.0268 | -4.1225  | 3.75E-05 | 0.1418 | 0.0087    |
| Peak expiratory flow         | -0.1077 | 0.0273 | -3.9384  | 8.20E-05 | 0.1477 | 0.0093    |
| Obesity class 1              | 0.1496  | 0.0395 | 3.7843   | 0.0002   | 0.2174 | 0.0119    |
| Obesity                      | 0.2302  | 0.0611 | 3.7668   | 0.0002   | 0.1244 | 0.0134    |



|                                          |         |        |         |        |        |        |
|------------------------------------------|---------|--------|---------|--------|--------|--------|
| Mothers age at death                     | -0.2959 | 0.0787 | -3.7611 | 0.0002 | 0.0351 | 0.0074 |
| Forced expiratory volume in 1 second     | -0.1063 | 0.0282 | -3.77   | 0.0002 | 0.178  | 0.0069 |
| Amyotrophic lateral sclerosis            | 0.3853  | 0.1067 | 3.6102  | 0.0003 | 0.0452 | 0.0123 |
| Forced expiratory volume in 1 second     | -0.0978 | 0.0275 | -3.5583 | 0.0004 | 0.1669 | 0.0063 |
| Body fat                                 | 0.18    | 0.0519 | 3.4667  | 0.0005 | 0.1081 | 0.0087 |
| Coronary artery disease                  | 0.1297  | 0.0374 | 3.4711  | 0.0005 | 0.0799 | 0.006  |
| Squamous cell lung cancer                | 0.3578  | 0.1062 | 3.3684  | 0.0008 | 0.0398 | 0.0117 |
| Parents age at death                     | -0.3047 | 0.0906 | -3.3641 | 0.0008 | 0.0292 | 0.007  |
| Triglycerides                            | 0.1262  | 0.0381 | 3.3128  | 0.0009 | 0.168  | 0.0299 |
| Lung cancer (squamous cell)              | 0.4367  | 0.1331 | 3.2808  | 0.001  | 0.0487 | 0.0204 |
| Urate                                    | 0.1084  | 0.0333 | 3.257   | 0.0011 | 0.1772 | 0.0607 |
| Attention deficit hyperactivity disorder | 0.3826  | 0.126  | 3.0375  | 0.0024 | 0.0698 | 0.0309 |
| Rheumatoid Arthritis                     | 0.1493  | 0.0494 | 3.0244  | 0.0025 | 0.1593 | 0.0273 |
| Lung adenocarcinoma                      | 0.4236  | 0.1402 | 3.022   | 0.0025 | 0.031  | 0.0117 |
| Overweight                               | 0.121   | 0.0406 | 2.983   | 0.0029 | 0.1114 | 0.0069 |
| Fasting insulin main effect              | 0.1986  | 0.0669 | 2.9683  | 0.003  | 0.0713 | 0.0102 |
| Forced vital capacity                    | -0.0805 | 0.0273 | -2.9478 | 0.0032 | 0.174  | 0.0062 |
| HDL cholesterol                          | -0.1359 | 0.0463 | -2.9361 | 0.0033 | 0.122  | 0.0251 |
| Obesity class 2                          | 0.1352  | 0.0461 | 2.9294  | 0.0034 | 0.1871 | 0.0127 |
| Forced vital capacity                    | -0.0768 | 0.0263 | -2.922  | 0.0035 | 0.1612 | 0.0056 |
| Peak expiratory flow                     | -0.2211 | 0.0781 | -2.8322 | 0.0046 | 0.1011 | 0.0201 |
| Parkinsons disease                       | -0.1912 | 0.0677 | -2.8263 | 0.0047 | 0.3725 | 0.1155 |
| Age at Menopause                         | -0.1338 | 0.0501 | -2.6692 | 0.0076 | 0.1373 | 0.0169 |

TABLE S6. Genetic overlap between GAD-2 trait anxiety and Anxiety/Panic disorder

| trait                  | rg     | se     | z       | p         | h2_obs | h2_obs_se |
|------------------------|--------|--------|---------|-----------|--------|-----------|
| Anxiety/Panic Disorder | 0.8557 | 0.0368 | 23.2277 | 2.39E-119 | 0.0374 | 0.0037    |

TABLE S7. eQTL evidence for top GWS SNPs

| uniqID      | db      | tissue                       | gene            | testedAlle | p        | signed_stats | FDR         | RiskIncAlle | chr | pos      | symbol    | eqlMapFilt |
|-------------|---------|------------------------------|-----------------|------------|----------|--------------|-------------|-------------|-----|----------|-----------|------------|
| 20:62706105 | GTEx_v7 | Brain_Caudate_basal_ganglia  | ENSG00000171695 | G          | 9.40E-06 | -0.357702    | 0.00916956  | G           | 20  | 62706105 | C20orf201 | 1          |
| 20:62707527 | GTEx_v7 | Brain_Caudate_basal_ganglia  | ENSG00000171695 | T          | 1.07E-05 | 0.363151     | 0.00916956  | T           | 20  | 62707527 | C20orf201 | 1          |
| 20:62709274 | GTEx_v7 | Brain_Caudate_basal_ganglia  | ENSG00000171695 | A          | 2.43E-06 | 0.380321     | 0.00916956  | A           | 20  | 62709274 | C20orf201 | 1          |
| 20:62712053 | GTEx_v7 | Brain_Caudate_basal_ganglia  | ENSG00000171695 | C          | 3.95E-06 | 0.368909     | 0.00916956  | C           | 20  | 62712053 | C20orf201 | 1          |
| 7:2085165   | GTEx_v7 | Brain_Cerebellar_Hemispheres | ENSG00000122687 | C          | 6.28E-06 | 0.297022     | 8.17E-08    | T           | 7   | 2085165  | FTSJ2     | 1          |
| 7:2085553   | GTEx_v7 | Brain_Cerebellar_Hemispheres | ENSG00000122687 | C          | 6.28E-06 | 0.297022     | 8.17E-08    | T           | 7   | 2085553  | FTSJ2     | 1          |
| 20:62692060 | GTEx_v7 | Brain_Cerebellar_Hemispheres | ENSG00000171700 | C          | 9.75E-07 | 0.452831     | 0.00257718  | C           | 20  | 62692060 | RGS19     | 1          |
| 20:62695931 | GTEx_v7 | Brain_Cerebellar_Hemispheres | ENSG00000125510 | A          | 2.53E-07 | 0.444876     | 0.000539622 | A           | 20  | 62695931 | OPRL1     | 1          |
| 20:62695931 | GTEx_v7 | Brain_Cerebellar_Hemispheres | ENSG00000171700 | A          | 2.19E-06 | 0.429128     | 0.00257718  | A           | 20  | 62695931 | RGS19     | 1          |
| 20:62696024 | GTEx_v7 | Brain_Cerebellar_Hemispheres | ENSG00000171700 | T          | 6.24E-06 | 0.424968     | 0.00257718  | T           | 20  | 62696024 | RGS19     | 1          |
| 20:62706105 | GTEx_v7 | Brain_Cerebellar_Hemispheres | ENSG00000125510 | G          | 7.56E-08 | 0.457153     | 0.000539622 | G           | 20  | 62706105 | OPRL1     | 1          |
| 20:62706105 | GTEx_v7 | Brain_Cerebellar_Hemispheres | ENSG00000171700 | G          | 5.36E-06 | 0.410154     | 0.00257718  | G           | 20  | 62706105 | RGS19     | 1          |
| 20:62707527 | GTEx_v7 | Brain_Cerebellar_Hemispheres | ENSG00000125510 | T          | 3.04E-07 | 0.439947     | 0.000539622 | T           | 20  | 62707527 | OPRL1     | 1          |
| 20:62707527 | GTEx_v7 | Brain_Cerebellar_Hemispheres | ENSG00000171700 | T          | 8.12E-06 | 0.404679     | 0.00257718  | T           | 20  | 62707527 | RGS19     | 1          |
| 20:62709274 | GTEx_v7 | Brain_Cerebellar_Hemispheres | ENSG00000125510 | A          | 8.76E-08 | 0.449324     | 0.000539622 | A           | 20  | 62709274 | OPRL1     | 1          |
| 20:62709274 | GTEx_v7 | Brain_Cerebellar_Hemispheres | ENSG00000171700 | A          | 2.37E-06 | 0.418317     | 0.00257718  | A           | 20  | 62709274 | RGS19     | 1          |
| 20:62712053 | GTEx_v7 | Brain_Cerebellar_Hemispheres | ENSG00000125510 | C          | 6.82E-08 | 0.446404     | 0.000539622 | C           | 20  | 62712053 | OPRL1     | 1          |
| 20:62712053 | GTEx_v7 | Brain_Cerebellar_Hemispheres | ENSG00000171700 | C          | 1.46E-06 | 0.420188     | 0.00257718  | C           | 20  | 62712053 | RGS19     | 1          |
| 20:62692060 | GTEx_v7 | Brain_Cerebellum             | ENSG00000171700 | C          | 9.42E-08 | 0.435066     | 0.000132103 | C           | 20  | 62692060 | RGS19     | 1          |
| 20:62695931 | GTEx_v7 | Brain_Cerebellum             | ENSG00000125510 | A          | 5.26E-07 | 0.388893     | 0.000621703 | A           | 20  | 62695931 | OPRL1     | 1          |
| 20:62695931 | GTEx_v7 | Brain_Cerebellum             | ENSG00000171700 | A          | 1.88E-08 | 0.446254     | 0.000132103 | A           | 20  | 62695931 | RGS19     | 1          |
| 20:62696024 | GTEx_v7 | Brain_Cerebellum             | ENSG00000125510 | T          | 3.42E-05 | 0.333873     | 0.000621703 | T           | 20  | 62696024 | OPRL1     | 1          |
| 20:62696024 | GTEx_v7 | Brain_Cerebellum             | ENSG00000171700 | T          | 6.54E-08 | 0.440536     | 0.000132103 | T           | 20  | 62696024 | RGS19     | 1          |
| 20:62706105 | GTEx_v7 | Brain_Cerebellum             | ENSG00000125510 | G          | 1.10E-07 | 0.411089     | 0.000621703 | G           | 20  | 62706105 | OPRL1     | 1          |
| 20:62706105 | GTEx_v7 | Brain_Cerebellum             | ENSG00000171700 | G          | 5.23E-08 | 0.435991     | 0.000132103 | G           | 20  | 62706105 | RGS19     | 1          |
| 20:62707527 | GTEx_v7 | Brain_Cerebellum             | ENSG00000125510 | T          | 1.55E-07 | 0.413277     | 0.000621703 | T           | 20  | 62707527 | OPRL1     | 1          |
| 20:62707527 | GTEx_v7 | Brain_Cerebellum             | ENSG00000171700 | T          | 1.08E-07 | 0.433475     | 0.000132103 | T           | 20  | 62707527 | RGS19     | 1          |
| 20:62709274 | GTEx_v7 | Brain_Cerebellum             | ENSG00000125510 | A          | 1.04E-07 | 0.410003     | 0.000621703 | A           | 20  | 62709274 | OPRL1     | 1          |
| 20:62709274 | GTEx_v7 | Brain_Cerebellum             | ENSG00000171700 | A          | 6.10E-08 | 0.432145     | 0.000132103 | A           | 20  | 62709274 | RGS19     | 1          |
| 20:62712053 | GTEx_v7 | Brain_Cerebellum             | ENSG00000125510 | C          | 9.95E-08 | 0.408897     | 0.000621703 | C           | 20  | 62712053 | OPRL1     | 1          |
| 20:62712053 | GTEx_v7 | Brain_Cerebellum             | ENSG00000171700 | C          | 1.28E-07 | 0.420938     | 0.000132103 | C           | 20  | 62712053 | RGS19     | 1          |

TABLE S8. Comorbidities in the SR-ANX cohorts using self-reports of other psychiatric traits. Top value is the number of effected individuals, number below is the proportion of individuals within each group.

|                         | 163731         | 28525        |
|-------------------------|----------------|--------------|
|                         | SR-Anx Control | SR-Anx Case  |
| SR-Depression           | 23208<br>14%   | 20831<br>73% |
| SR-ADHD                 | 2208<br>1%     | 2343<br>8%   |
| SR-Bipolar              | 0<br>0%        | 0<br>0%      |
| SR-PTSD                 | 14023<br>9%    | 14305<br>50% |
| SR-Eating Disorder      | 2225<br>1%     | 1518<br>5%   |
| SR-Personality Disorder | 914<br>1%      | 2159<br>8%   |
| SR-Schizophrenia        | 0<br>0%        | 0<br>0%      |
| SR-Social Phobia        | 0<br>0%        | 2888<br>10%  |

TABLE S9. Replication of UKB Anxiety lead SNPs

| GWA                               | rsid       | CHR | A1 | A2 | Purves et al. UKBio <sup>2</sup> |       |                         | MVP GAD2 Result* |        |          |
|-----------------------------------|------------|-----|----|----|----------------------------------|-------|-------------------------|------------------|--------|----------|
|                                   |            |     |    |    | AF                               | Beta  | P                       | AF               | Beta   | P        |
| Any Anxiety Disorder Case/Control | rs10809485 | 9   | G  | A  | 0.24                             | -0.04 | 3.3 x 10 <sup>-12</sup> | 0.2462           | -0.012 | 0.0612   |
|                                   | rs2996471  | 9   | G  | T  | 0.79                             | 0.04  | 7.8 x 10 <sup>-9</sup>  | 0.8098           | -0.004 | 0.5604   |
|                                   | rs3807866  | 7   | A  | G  | 0.42                             | 0.03  | 1.1 x 10 <sup>-8</sup>  | 0.3981           | 0.016  | 0.006008 |
| GAD-7 Severity Case/Control       | rs17189482 | 9   | G  | T  | 0.21                             | -0.04 | 4.2 x 10 <sup>-9</sup>  | 0.2028           | -0.021 | 0.002853 |

1. Maurano, M.T. *et al.* Systematic localization of common disease-associated variation in regulatory DNA. *Science* **337**, 1190-5 (2012).
2. Purves, K.L. *et al.* The Common Genetic Architecture of Anxiety Disorders. *bioRxiv*, 203844 (2017).
